# Supplementary material for: Characterization of microRNAs and Target Genes in Musa acuminata subsp. burmannicoides, var. Calcutta 4 during Interaction with Pseudocercospora musae
Source: MDPI journal article supplement (doi:10.3390/plants12071473), 2023-03-28
Supplement: s1 [file s1]

**SUPPLEMENTARY FIGURE S1.** Predicted hairpin secondary structure of novel *Musa acuminata* var. Calcutta 4 miRNAs. Secondary structures were determined using the program Forna. Mature sequences are highlighted in light blue. Star sequences are highlighted in light green. A putative star sequence is highlighted in light grey.

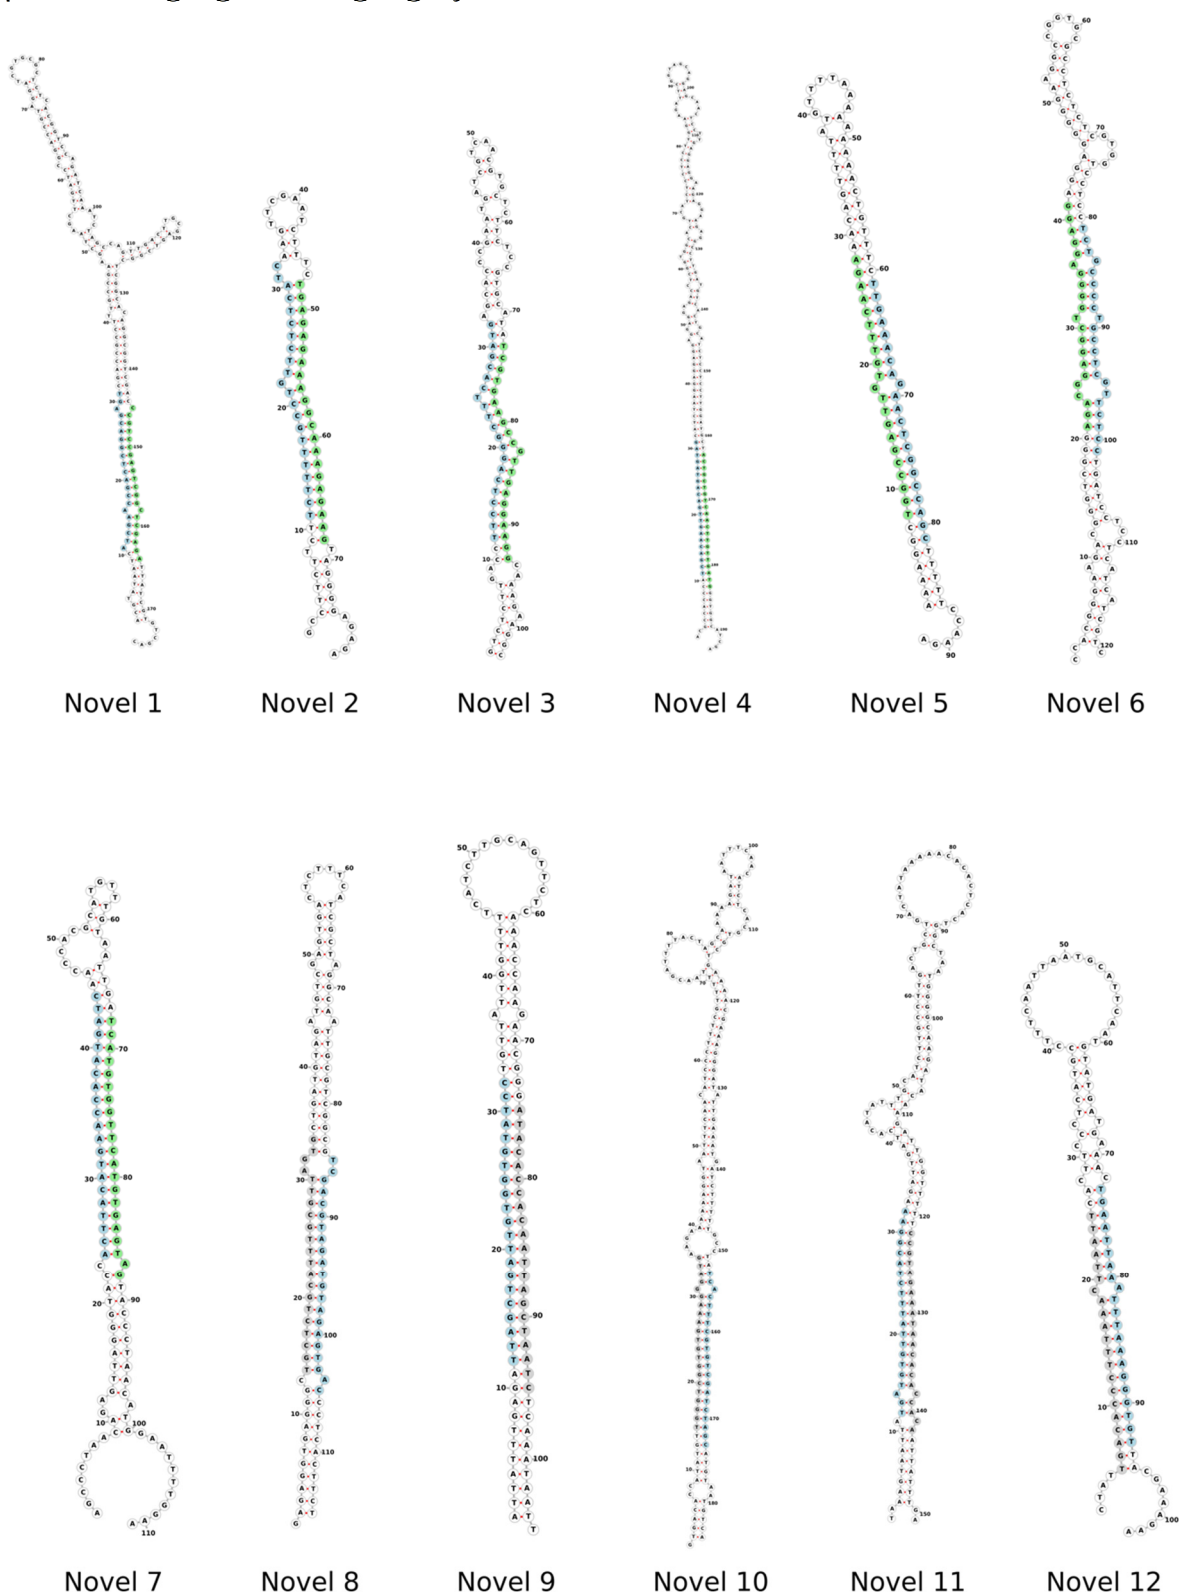

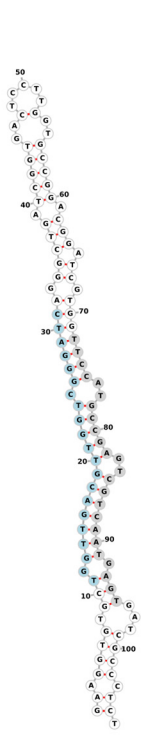

Novel 13

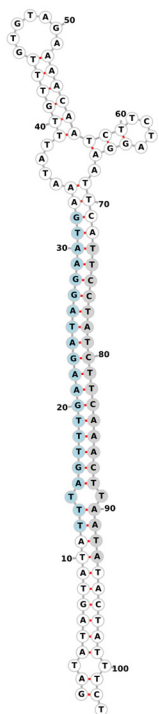

Novel 14

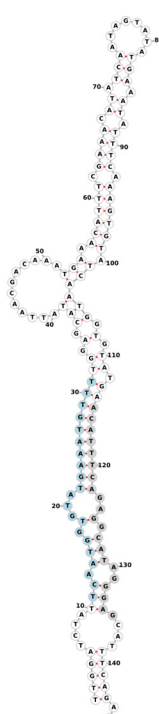

Novel 15

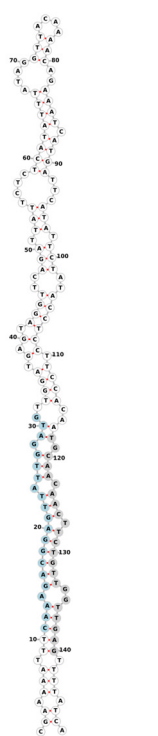

Novel 16

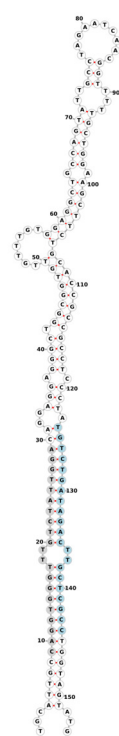

Novel 17

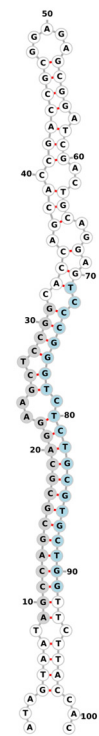

Novel 18

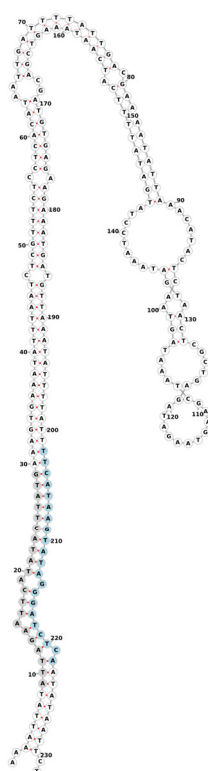

Novel 19

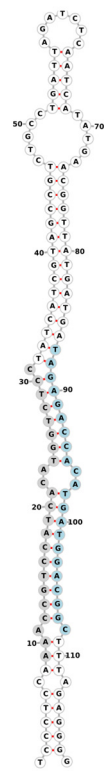

Novel 20

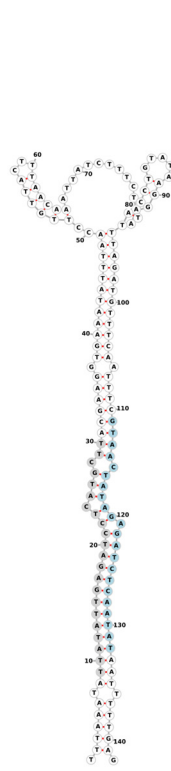

Novel 21

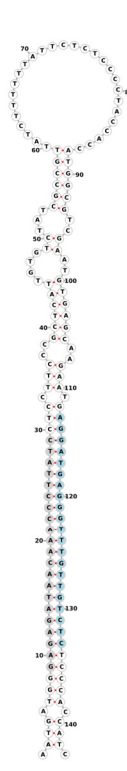

Novel 22

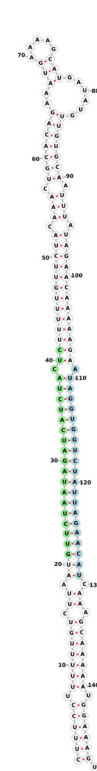

Novel 23

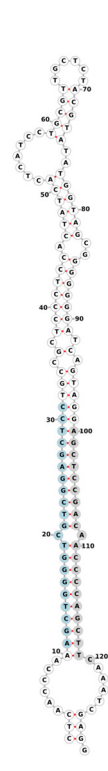

Novel 24
