# Supplementary material for: Characterization of microRNAs and Target Genes in Musa acuminata subsp. burmannicoides, var. Calcutta 4 during Interaction with Pseudocercospora musae
Source: MDPI journal article supplement (doi:10.3390/plants12071473), 2023-03-28
Supplement: s1 [file s1]

**Supplementary Table S5:** List of specific primers for stem-loop RT-qPCR and conventional RT-qPCR validation of expression of selected *Musa acuminata* var. Calcutta 4 miRNAs and *Musa* target genes

| Primer sequences and supporting information for stem-loop RT-PCR analysis of differential gene expression of <i>Musa</i> miRNAs during interaction with <i>Pseudocercopsora musae</i>      |                                                  |                                                     |                        |                             |
|--------------------------------------------------------------------------------------------------------------------------------------------------------------------------------------------|--------------------------------------------------|-----------------------------------------------------|------------------------|-----------------------------|
| Musa miRNA                                                                                                                                                                                 | Primer                                           | Primer sequence (5'-3')                             |                        | Expected Amplicon size (bp) |
| miR397a-5p                                                                                                                                                                                 | Stem-loop RT                                     | GTTGGCTCTGGTGCAGGGTCCGAGGTATTGCGACCAGAGCCAAC TCTCAT |                        | 80 pb                       |
|                                                                                                                                                                                            | Forward                                          | GTTGTTGAGTGCAGCGTTG                                 |                        |                             |
|                                                                                                                                                                                            | Universal reverse                                | GTGCAGGGTCCGAGGT                                    |                        |                             |
| miR167a-3p                                                                                                                                                                                 | Stem-loop RT                                     | GTTGGCTCTGGTGCAGGGTCCGAGGTATTGCGACCAGAGCCAACCTCAGAT |                        | 80 pb                       |
|                                                                                                                                                                                            | Forward                                          | GTTTGAAGCTGCCAGCATG                                 |                        |                             |
|                                                                                                                                                                                            | Universal reverse                                | GTGCAGGGTCCGAGGT                                    |                        |                             |
| miR393b-3p                                                                                                                                                                                 | Stem-loop RT                                     | GTTGGCTCTGGTGCAGGGTCCGAGGTATTGCGACCAGAGGCCAACGATC   |                        | 80 pb                       |
|                                                                                                                                                                                            | Forward                                          | GTTGTCCAAACGGATCCA                                  |                        |                             |
|                                                                                                                                                                                            | Universal reverse                                | GTGCAGGGTCCGAGGT                                    |                        |                             |
| miR171a-3p                                                                                                                                                                                 | Stem-loop RT                                     | TTGGCTCTGGTGCAGGGTCCGAGGTATTGCGACCAGAGCCAACGATA     |                        | 80 pb                       |
|                                                                                                                                                                                            | Forward                                          | GTTTTGATTGAGCCGTGCC                                 |                        |                             |
|                                                                                                                                                                                            | Universal reverse                                | GTGCAGGGTCCGAGGT                                    |                        |                             |
| miR171e-3p                                                                                                                                                                                 | Stem-loop RT                                     | GTTGGCTCTGGTGCAGGGTCCGAGGTATTGCGACCAGAGCCAACAGAGAT  |                        | 80 pb                       |
|                                                                                                                                                                                            | Forward                                          | GTTGTTGAGCCGCGTCAAT                                 |                        |                             |
|                                                                                                                                                                                            | Universal reverse                                | GTGCAGGGTCCGAGGT                                    |                        |                             |
| miR535d-5p                                                                                                                                                                                 | Stem-loop RT                                     | GTTGGCTCTGGTGCAGGGTCCGAGGTATTGCGACCAGAGCCAACGCGTGC  |                        | 80 pb                       |
|                                                                                                                                                                                            | Forward                                          | GTGGTGACAACGAGAGAGA                                 |                        |                             |
|                                                                                                                                                                                            | Universal reverse                                | GTGCAGGGTCCGAGGT                                    |                        |                             |
| miR156b-5p                                                                                                                                                                                 | Stem-loop RT                                     | GTTGGCTCTGGTGCAGGGTCCGAGGTATTGCGACCAGAGCCAAC GTGCTC |                        | 80 pb                       |
|                                                                                                                                                                                            | Forward                                          | GTTGGTGACAGGAGAGAGT                                 |                        |                             |
|                                                                                                                                                                                            | Universal reverse                                | GTGCAGGGTCCGAGGT                                    |                        |                             |
| miR167b-3p                                                                                                                                                                                 | Stem-loop RT                                     | GTTGGCTCTGGTGCAGGGTCCGAGGTATTGCGACCAGAGCCAAC TCAGAT |                        | 80 pb                       |
|                                                                                                                                                                                            | Forward                                          | GTGTAAAGCTGCCAGCATG                                 |                        |                             |
|                                                                                                                                                                                            | Universal reverse                                | GTGCAGGGTCCGAGGT                                    |                        |                             |
| miR167a-5p                                                                                                                                                                                 | Stem-loop RT                                     | GTTGGCTCTGGTGCAGGGTCCGAGGTATTGCGACCAGAGCCAACCTCAGAT |                        | 80 pb                       |
|                                                                                                                                                                                            | Forward                                          | GTTTCAAGCTGCCAGCATG                                 |                        |                             |
|                                                                                                                                                                                            | Universal reverse                                | GTGCAGGGTCCGAGGT                                    |                        |                             |
| miR164c-5p                                                                                                                                                                                 | Stem-loop RT                                     | GTTGGCTCTGGTGCAGGGTCCGAGGTATTGCGACCAGAGCCAAC ACACGT |                        | 80 pb                       |
|                                                                                                                                                                                            | Forward                                          | TTGGTGGAGAAGCAGGGC                                  |                        |                             |
|                                                                                                                                                                                            | Universal reverse                                | GTGCAGGGTCCGAGGT                                    |                        |                             |
| <i>Musa</i> target genes of miRNAs, primer sequences and supporting information for RT-qPCR analysis of differential gene expression during interaction with <i>Pseudocercopsora musae</i> |                                                  |                                                     |                        |                             |
| Target reference<br><i>Musa acuminata</i><br>DH Pahang Gene ID                                                                                                                             | Predicted gene function                          | Forward Primer (5'-3')                              | Reverse Primer (5'-3') | Expected Amplicon size (bp) |
| Ma03_g12850                                                                                                                                                                                | pentatricopeptide repeat-containing protein-like | TACTGGGTGTTGCTGTCTAATG                              | CCAACCTCAACCCAGCTAAA   | 120 pb                      |
| Ma04_g10650                                                                                                                                                                                | Acireductone dioxygenase                         | GACACAAGCAGAGTGTCTTCTA                              | TGGTCCTCATCACTCTCATCTA | 102 pb                      |
| Ma06_g18000                                                                                                                                                                                | transport inhibitor response 1-like protein      | TGTTTGTGGCAACTGCTATG                                | CTTGACGCTCAGCGAATTTATC | 96 pb                       |
| Ma06_g38750                                                                                                                                                                                | scarecrow-like protein 6                         | GACACAAGCAGAGTGTCTTCTA                              | AGAGGGAAAGGGATGTTTGG   | 100 pb                      |
| Ma08_g07960                                                                                                                                                                                | 30S ribosomal protein S17                        | TAGCAGCAGCATCAGTTCTC                                | GAGGAGAGTTGGAGGAAAGAAG | 92 pb                       |
| Ma09_g28300                                                                                                                                                                                | squamosa promoter-binding-like protein 14        | GTCTCTTACTCTCTCCAAAGAAG                             | GCAGCTCTCTCTACAGCTTATC | 89 pb                       |
| Ma11_g01530                                                                                                                                                                                | auxin response factor 12-like                    | CAGACACATTCCAGGTTCTCTAA                             | GAAGTCCGGCTTGTCTGTA    | 100 pb                      |
| Ma11_g24070                                                                                                                                                                                | probable alpha-glucosidase                       | CACTCTCGATCCCATCAACTTC                              | CATACTTCTGCCATTCTCGT   | 105 pb                      |
