# Supplementary material for: Characterization of microRNAs and Target Genes in Musa acuminata subsp. burmannicoides, var. Calcutta 4 during Interaction with Pseudocercospora musae
Source: MDPI journal article supplement (doi:10.3390/plants12071473), 2023-03-28
Supplement: s1 [file s1]

**SUPPLEMENTARY TABLE S1.** Summary statistics for all known conserved and novel *Musa acuminata* var. Calcutta 4 miRNAs

| Family       | Loci       | Paired miRNAs | Unpaired miRNAs | Unique major miRNAs | Unique miRNA-miRNA* |
|--------------|------------|---------------|-----------------|---------------------|---------------------|
| miR156       | 25         | 19            | 6               | 6                   | 17                  |
| miR157       | 4          | 4             | 0               | 1                   | 2                   |
| miR159       | 7          | 4             | 3               | 3                   | 3                   |
| miR160       | 10         | 5             | 5               | 3                   | 2                   |
| miR162       | 6          | 6             | 0               | 2                   | 3                   |
| miR164       | 10         | 9             | 1               | 4                   | 8                   |
| miR166       | 20         | 18            | 2               | 3                   | 9                   |
| miR167       | 14         | 8             | 6               | 4                   | 6                   |
| miR168       | 9          | 9             | 0               | 2                   | 5                   |
| miR169       | 6          | 2             | 4               | 3                   | 1                   |
| miR171       | 19         | 17            | 2               | 8                   | 13                  |
| miR172       | 14         | 13            | 1               | 2                   | 7                   |
| miR319       | 3          | 2             | 1               | 3                   | 2                   |
| miR390       | 5          | 5             | 0               | 2                   | 5                   |
| miR391       | 2          | 2             | 0               | 2                   | 2                   |
| miR393       | 6          | 4             | 2               | 2                   | 4                   |
| miR395       | 3          | 2             | 1               | 1                   | 2                   |
| miR396       | 17         | 16            | 1               | 5                   | 15                  |
| miR397       | 1          | 1             | 0               | 1                   | 1                   |
| miR398       | 1          | 1             | 0               | 1                   | 1                   |
| miR399       | 1          | 0             | 1               | 0                   | 0                   |
| miR408       | 1          | 1             | 0               | 1                   | 1                   |
| miR482       | 1          | 1             | 0               | 1                   | 1                   |
| miR528       | 1          | 1             | 0               | 1                   | 1                   |
| miR529       | 4          | 4             | 0               | 2                   | 2                   |
| miR530       | 1          | 1             | 0               | 1                   | 1                   |
| miR535       | 8          | 8             | 0               | 2                   | 6                   |
| miR827       | 1          | 1             | 0               | 1                   | 1                   |
| miR1432      | 1          | 1             | 0               | 1                   | 1                   |
| miR2118      | 1          | 1             | 0               | 1                   | 1                   |
| Novel        | 24         | 9             | 15              | 9                   | 9                   |
| <b>Total</b> | <b>226</b> | <b>175</b>    | <b>51</b>       | <b>78</b>           | <b>132</b>          |

§
