# Supplementary material for: Characterization of microRNAs and Target Genes in Musa acuminata subsp. burmannicoides, var. Calcutta 4 during Interaction with Pseudocercospora musae
Source: MDPI journal article supplement (doi:10.3390/plants12071473), 2023-03-28
Supplement: s1 [file s1]

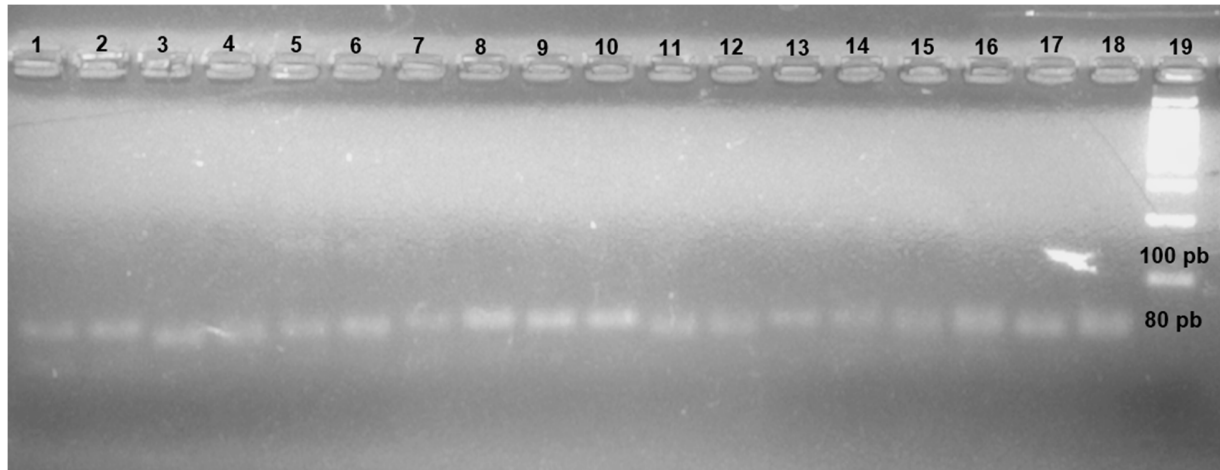

**SUPPLEMENTARY FIGURE S3.** RT-PCR-derived amplicons of expected product size for *Musa* miRNAs. 1: miR171a-3p\_I; 2: miR171a-3p\_NI; 3: miR164c-5p\_I; 4: miR164c-5p\_NI; 5: mi171e-3p\_I; 6: mi171e-3p\_NI; 7: miR393b-3p\_I; 8: miR393b-3p\_NI; 9: miR397a-5p\_I; 10: miR397a-5p\_NI; 11: miR167a-3p\_I; 12: miR167a-3p\_NI; 13: miR167b-3p\_I; 14: miR167b-3p\_NI; 15: miR167a-5p\_I; 16: miR167a-5p\_NI; 17: miR535d-5p\_I; 18: miR535d-5p\_NI; 19: 100bp DNA ladder (Promega).
